# Supplementary material for: Sample size and statistical power considerations in high-dimensionality data settings: a comparative study of classification algorithms
Source: Springer Nature journal article supplement (doi:10.1186/1471-2105-11-447), 2010-09-03
Supplement: Additional file 1 [file 1471-2105-11-447-s1.doc]

**Simulation Results – Supplement**


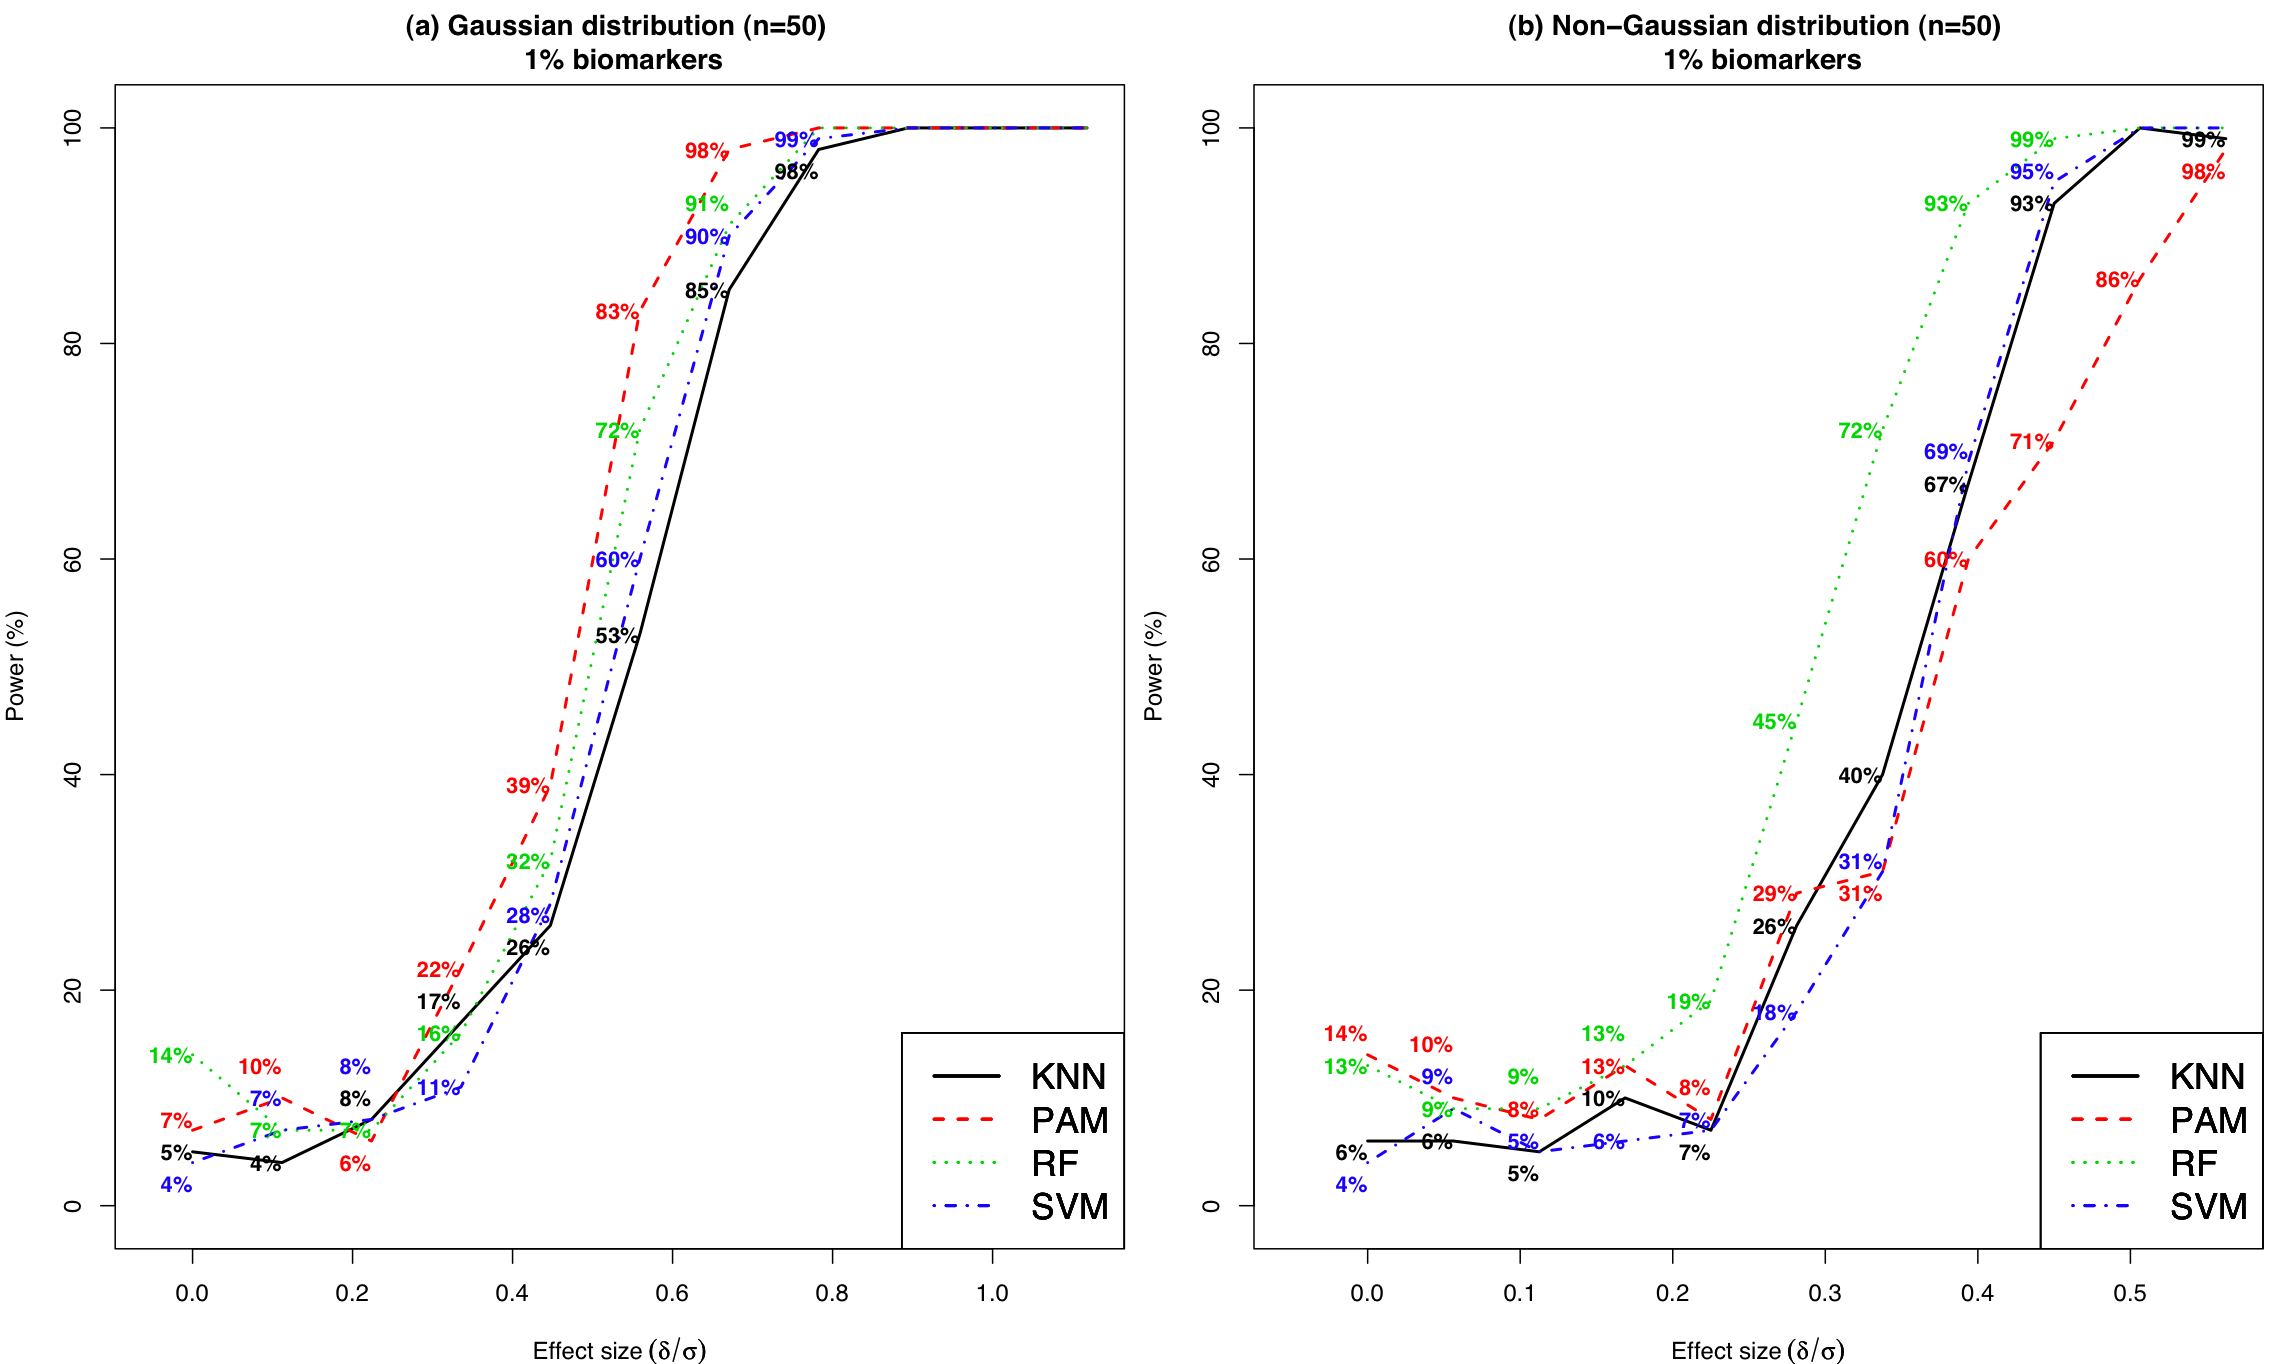


Figure S1: Comparison of statistical power of classifiers under the assumption of N=50 .

Each dataset included 1000 features per subject, where *n*=50 and *k*=1%. Results shown in Panel (a) were based on a Gaussian model for class conditional feature distributions. Results shown in Panel (b) were based on a mixture model to generate skewed, non-Gaussian class conditional feature distributions. Results are based on 100 simulated datasets.


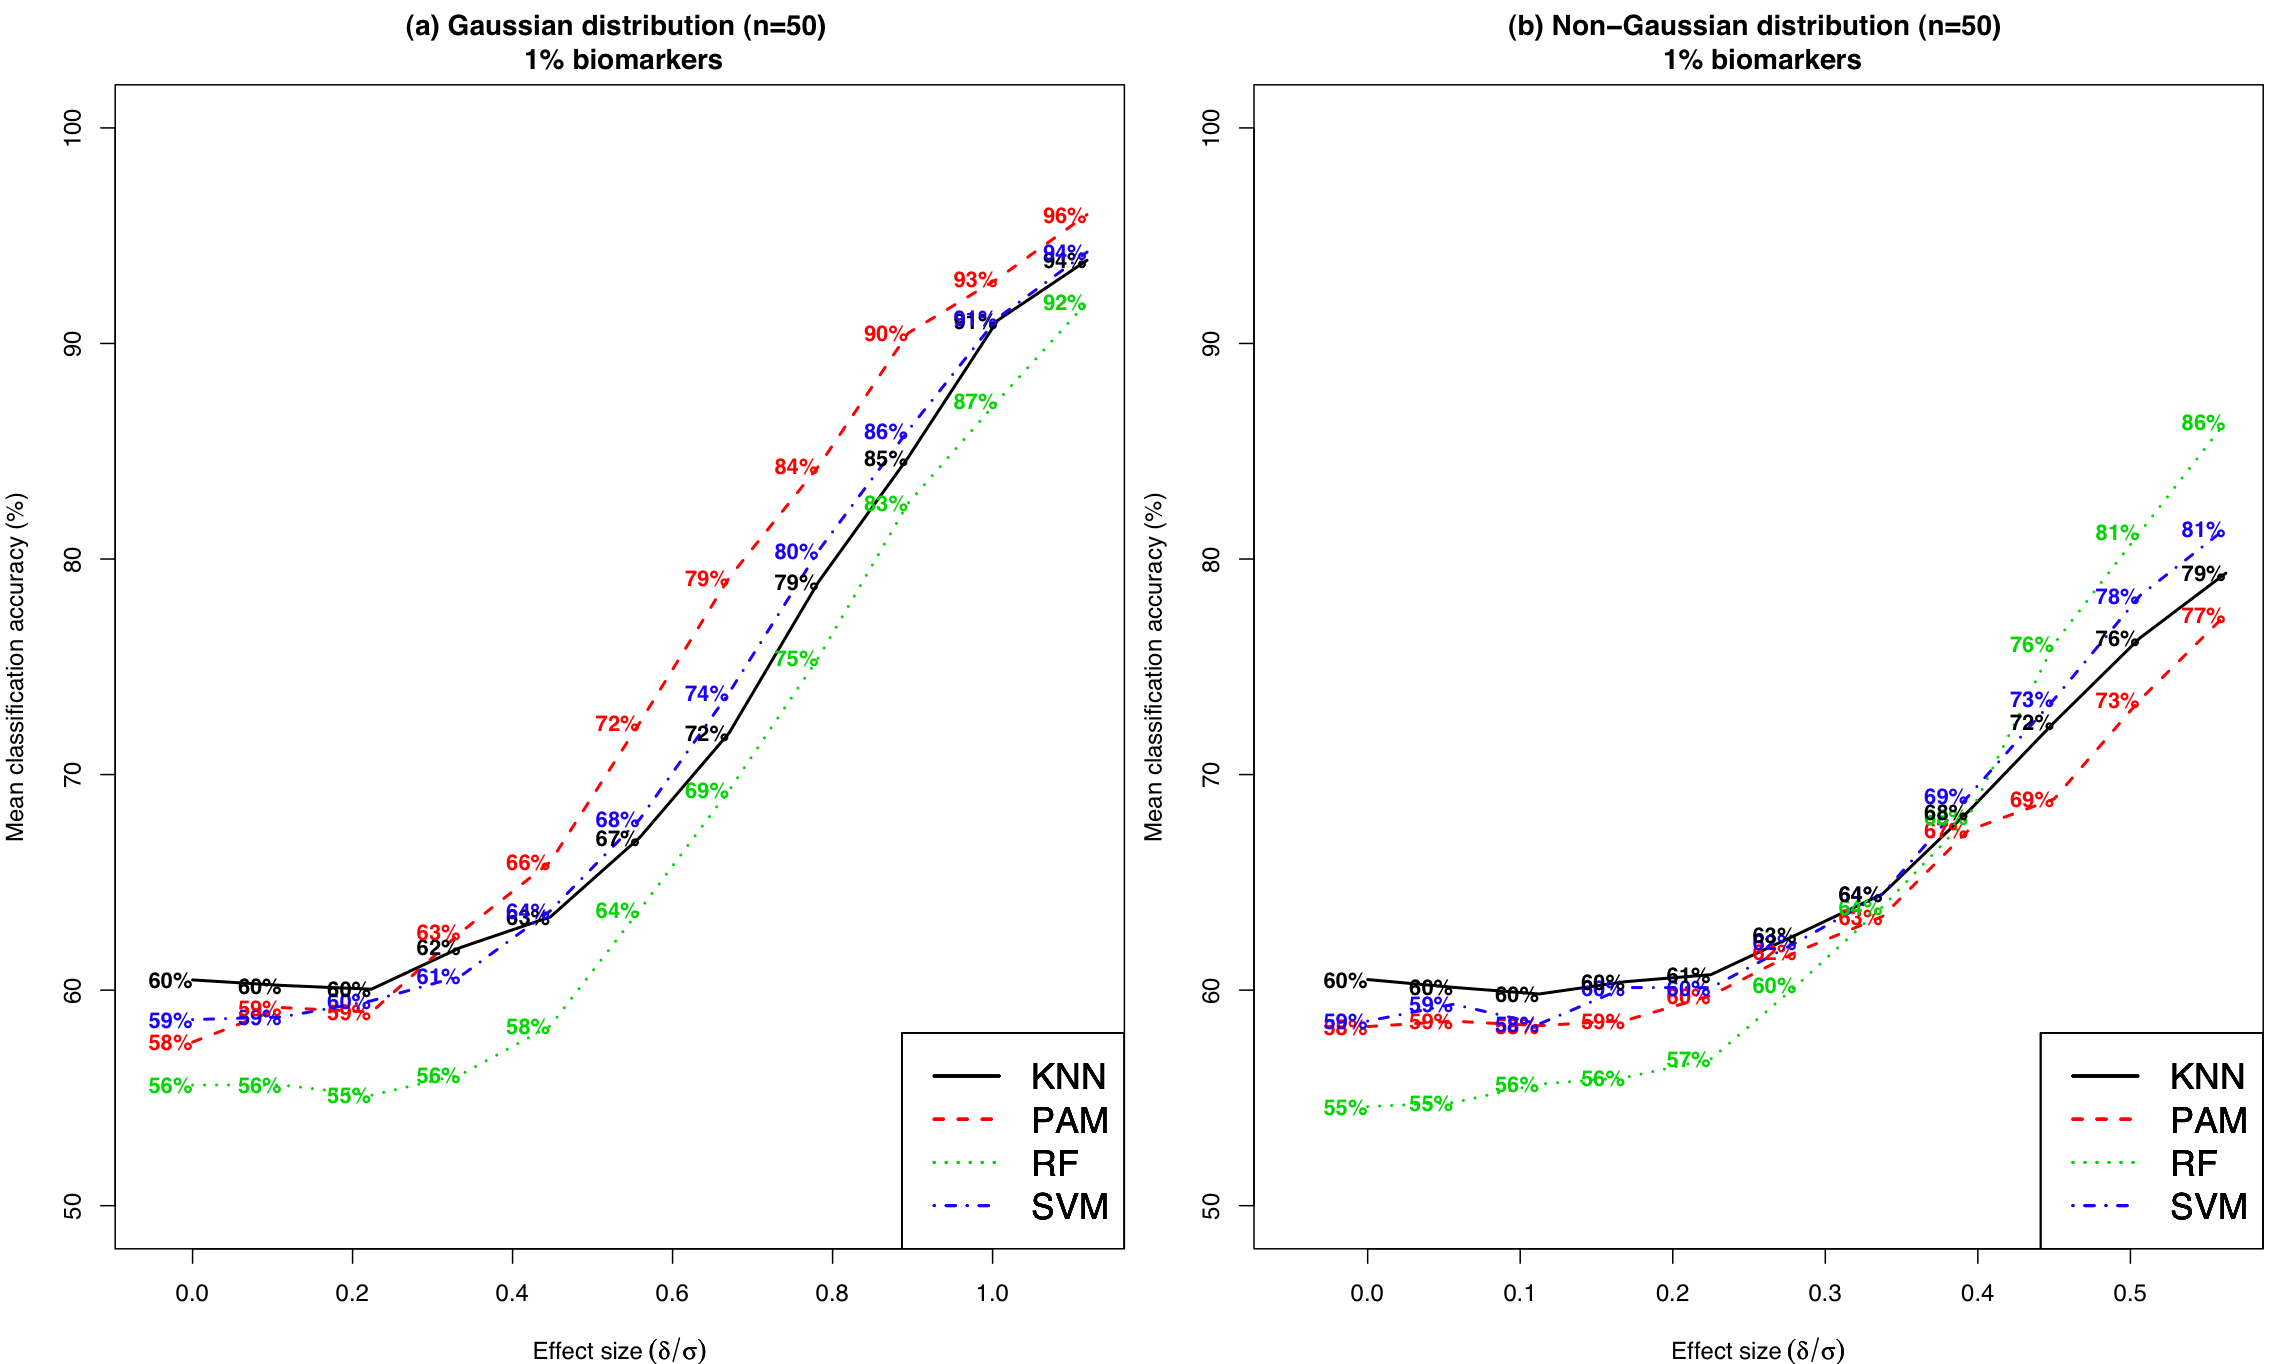


Figure S2: Comparison of average classification accuracy of classifiers under the assumption of N=50.

Each dataset included 1000 features per subject, where *n*=50 and *k*=1%. Results shown in Panel (a) were based on a Gaussian model for class conditional feature distributions. Results shown in Panel (b) were based on a mixture model to generate skewed, non-Gaussian class conditional feature distributions. Results are based on 100 simulated datasets.


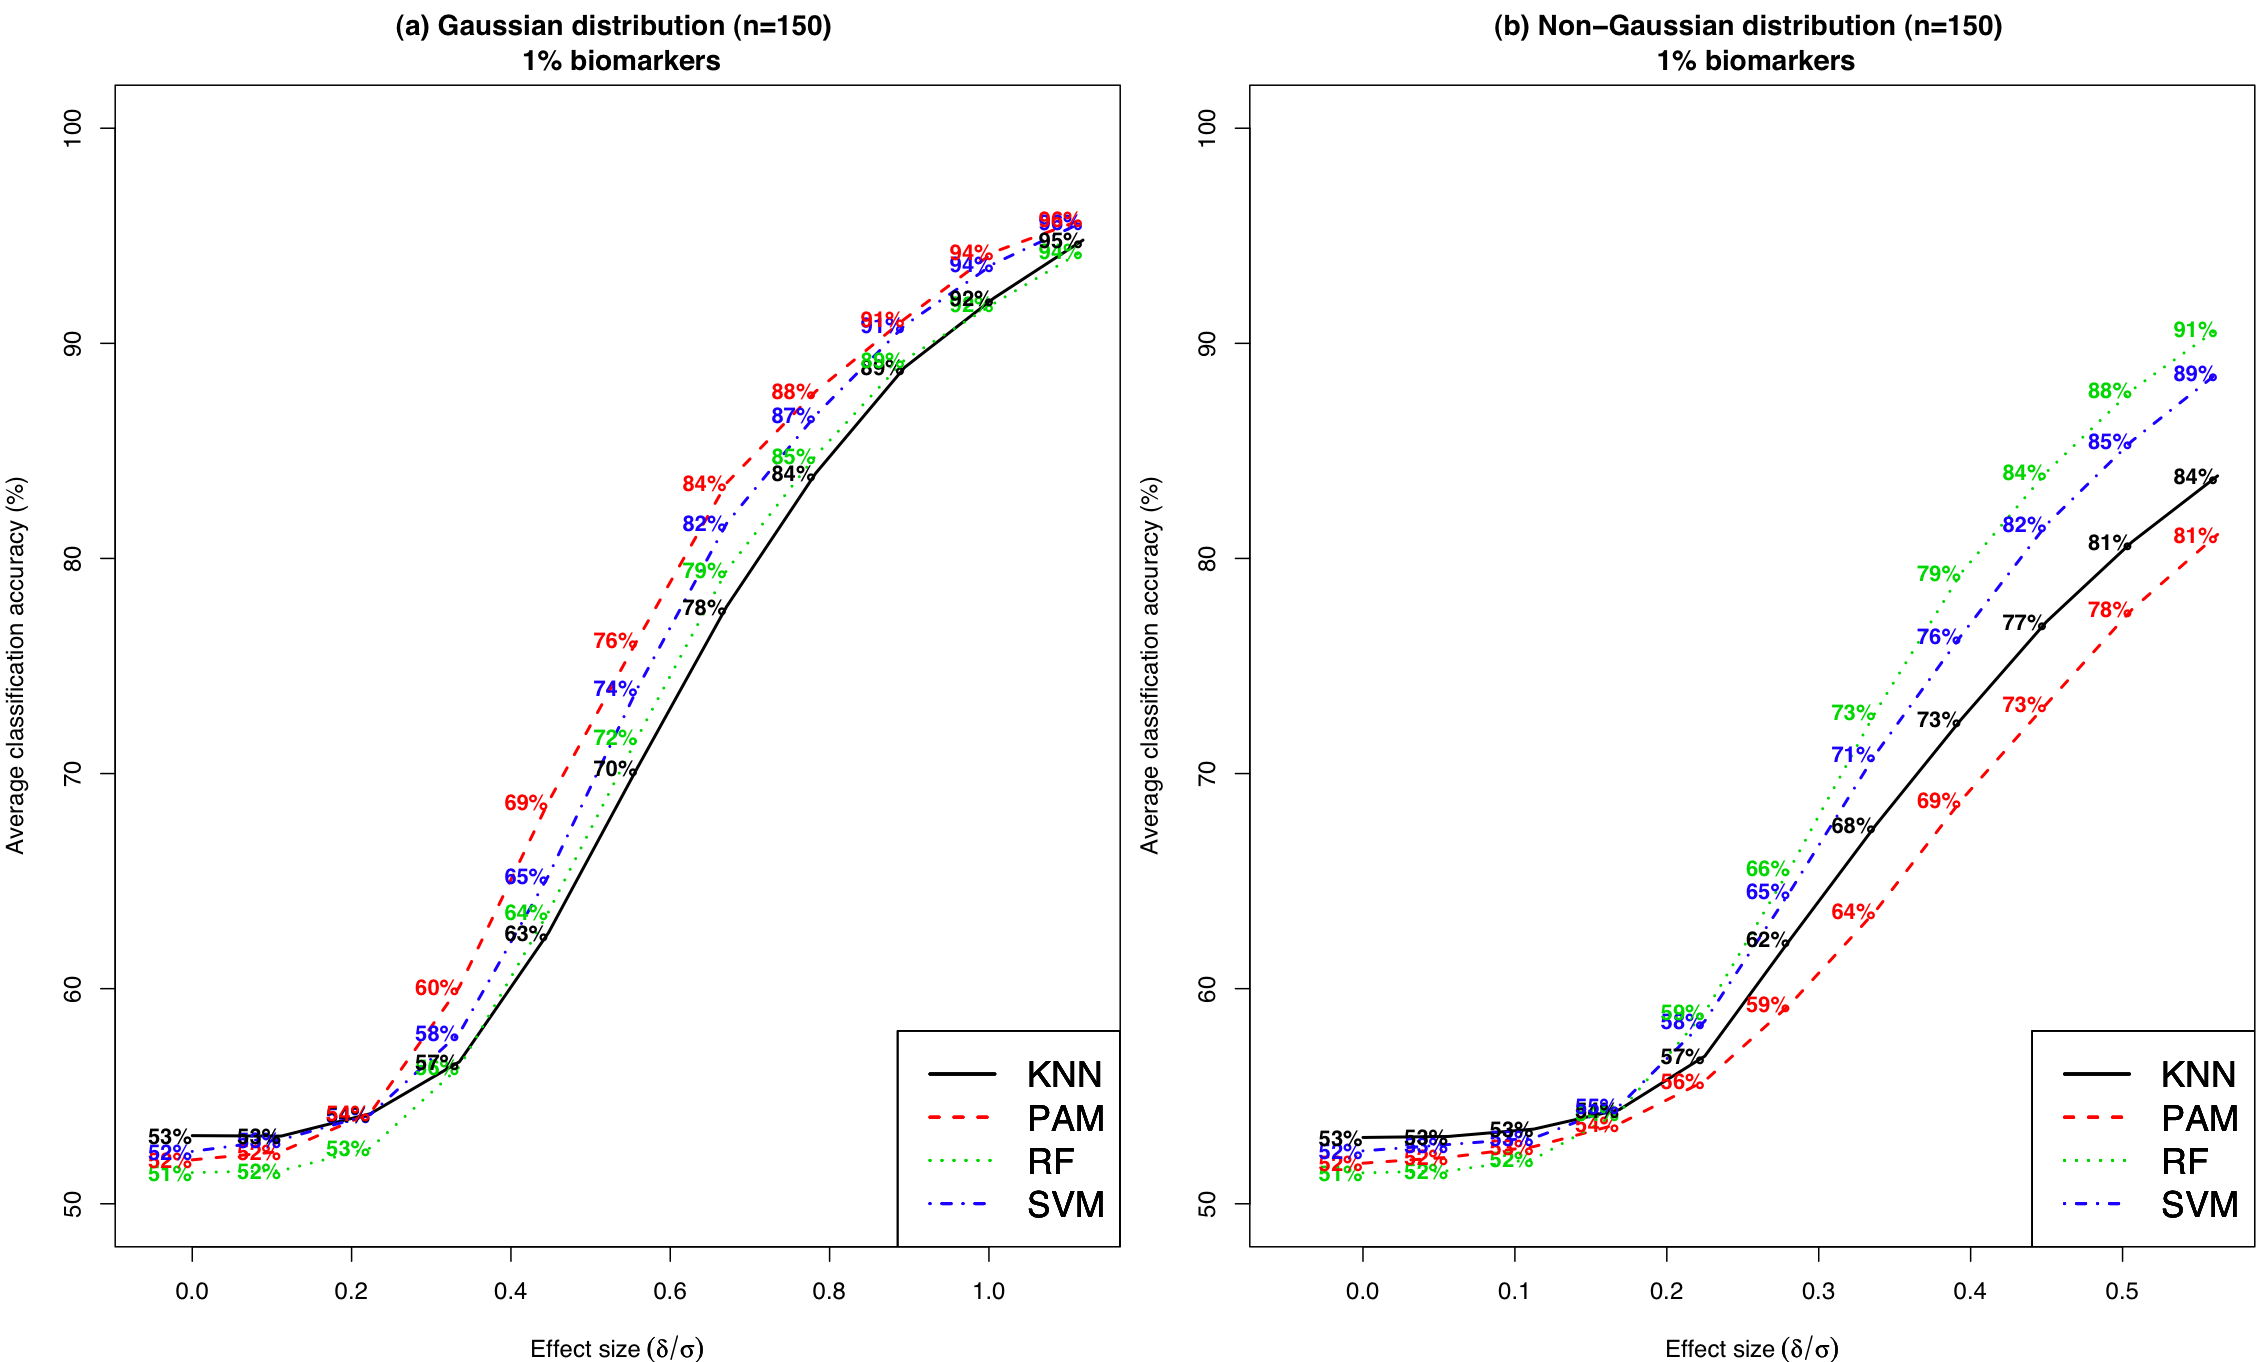


Figure S3: Comparison of average classification accuracy of classifiers. Estimates of average classification accuracy were based on simulated independent test datasets.

Each dataset included 1000 features per subject, where *n*=150 and *k*=1%. Results shown in Panel (a) were based on a Gaussian model for class conditional feature distributions. Results shown in Panel (b) were based on a mixture model to generate skewed, non-Gaussian class conditional feature distributions. Results are based on 100 simulated datasets. Average classification accuracy estimates were derived based on simulated independent test datasets of 400 subjects (*n*=200).
